# Supplementary material for: High performance solid polymer electrolyte with graphene oxide nanosheets
Source: Royal Society of Chemistry journal article supplement (doi:10.1039/c4ra07919a), 2014-01-01
Supplement: c4ra07919a1.pdf [file c4ra07919a1.pdf]

## Supplementary

### High Performance Solid Polymer Electrolyte with Graphene Oxide Nanosheets

Mengying Yuan<sup>a</sup>, Jeremy Erdman<sup>a,c</sup>, Changyu Tang<sup>b</sup>, Haleh Ardebili<sup>a</sup>

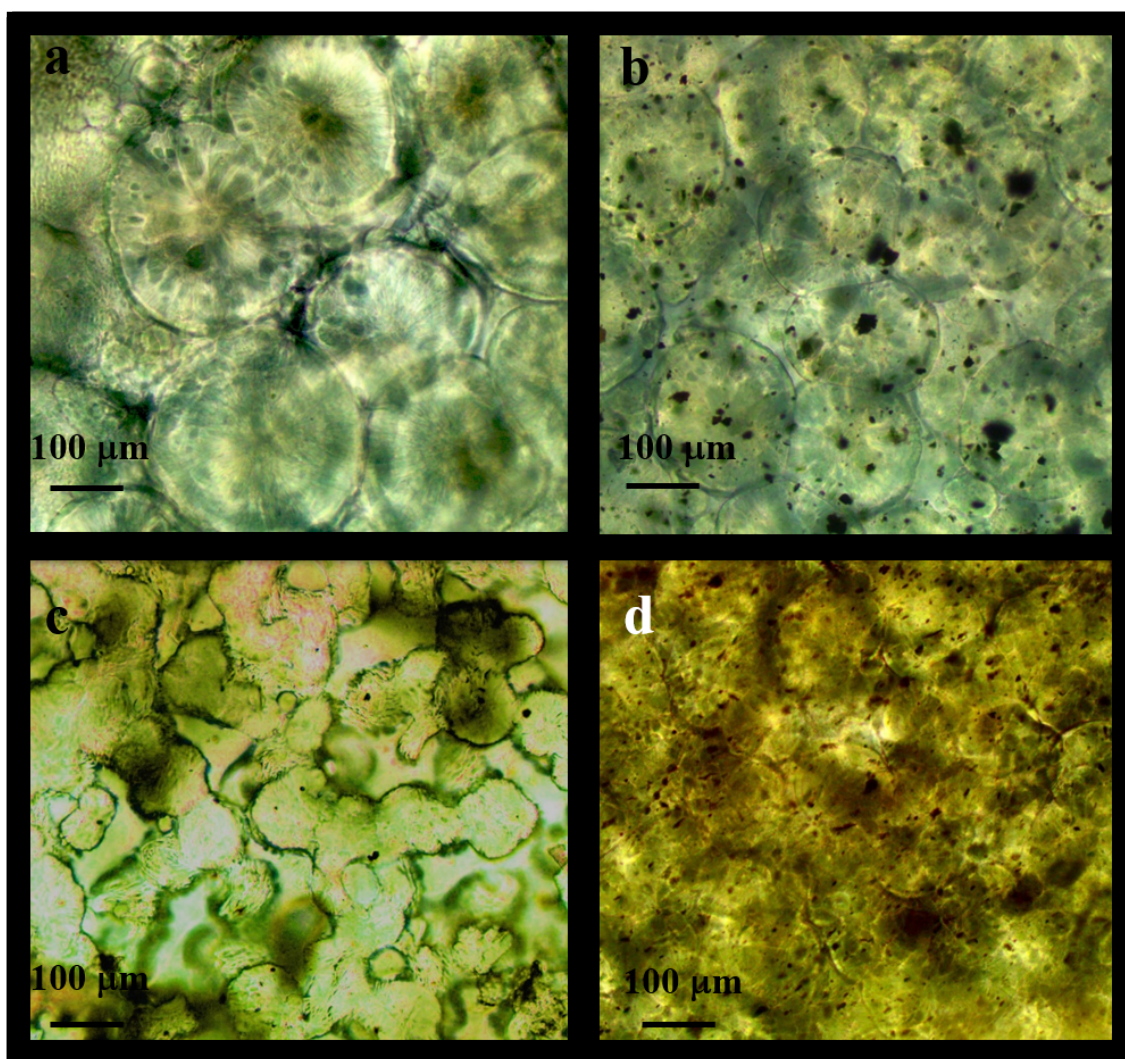

Figure S1 Polarized light microscopy (PLM) of a) filler-free polymer electrolyte b) 0.5 wt. % GO c) 1 wt. % GO and d) 5 wt. % GO/PEO-Li polymer electrolyte

The ion conductivity  $\sigma$  of the PEO electrolytes was calculated using  $\sigma = d / RS$  where  $R$  is the bulk resistance obtained from the Nyquist plots (Figure S1), and  $d$  and  $S$  are the thickness and area of the samples, respectively.

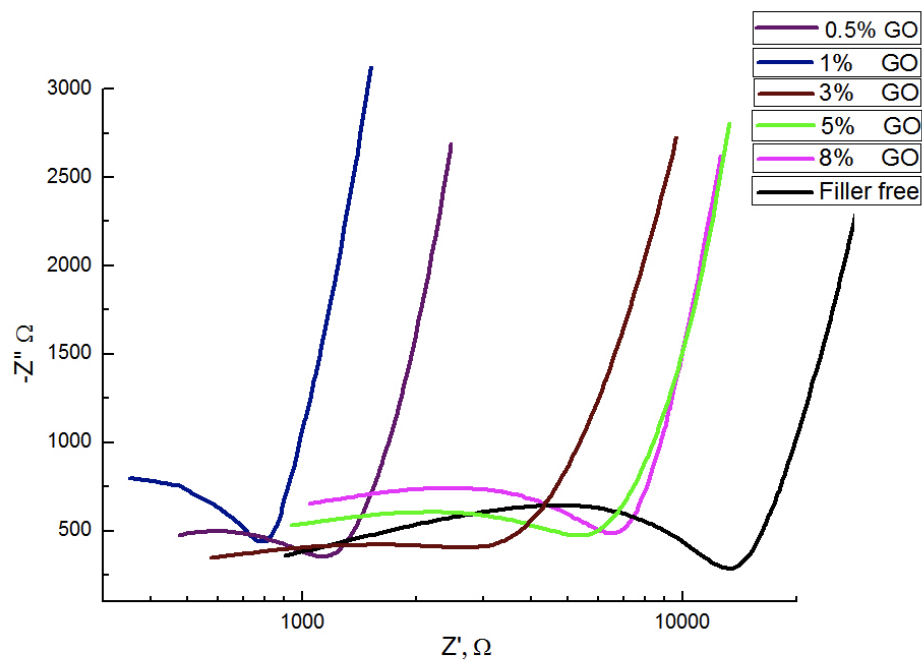

Figure S2 Nyquist (complex impedance) plots for pure and PEO/GO composite electrolytes (film thickness: 0.0203 cm, film area: 2.84 cm<sup>2</sup>)

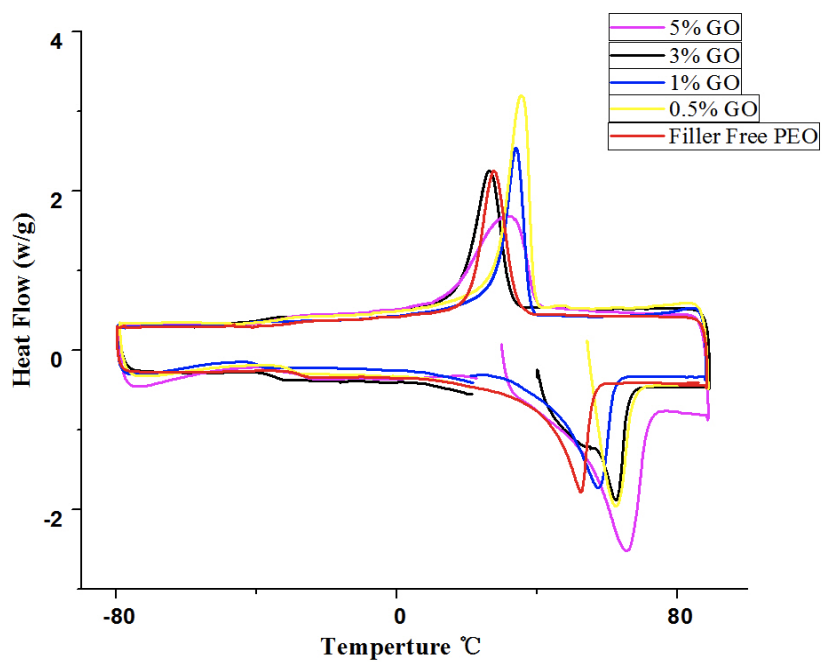

Figure S3 Differential Scanning Calorimetry (DSC) of pure and PEO/GO composite electrolytes

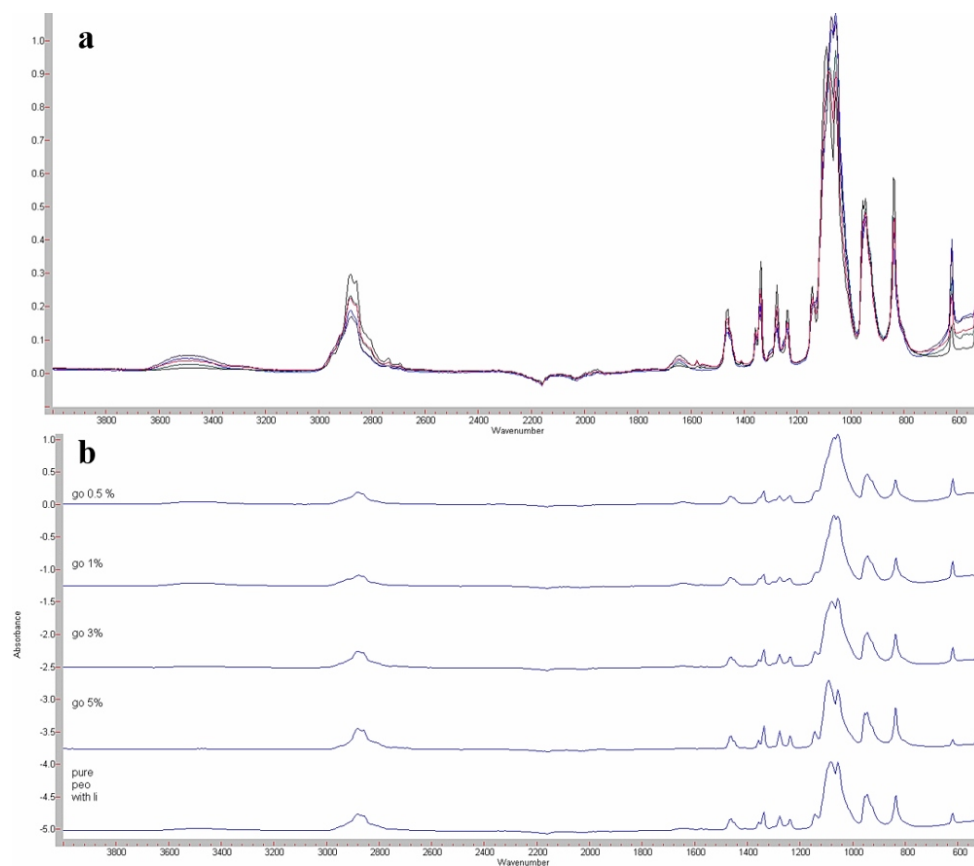

Figure S4 Fourier Transform Infrared (FTIR) spectra of pure and PEO/GO composite electrolytes: a) combined, b) shown separately.

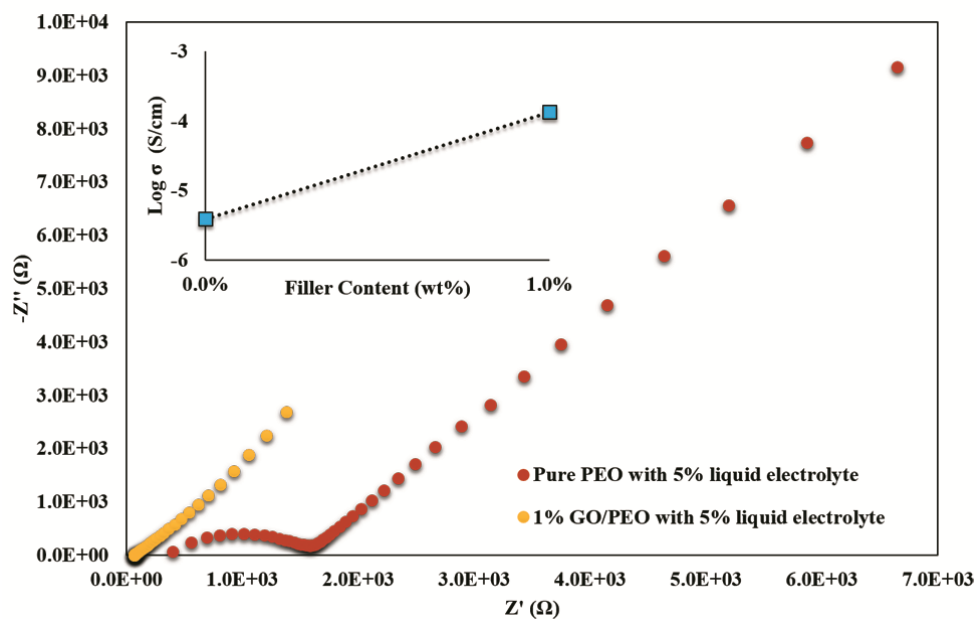

Figure S5 Complex impedance spectra of pure PEO and PEO/1%GO both with 5% liquid plasticizer and the respective ion conductivities (inset) (film thickness: 0.025cm, film area: 2.84 cm<sup>2</sup>)

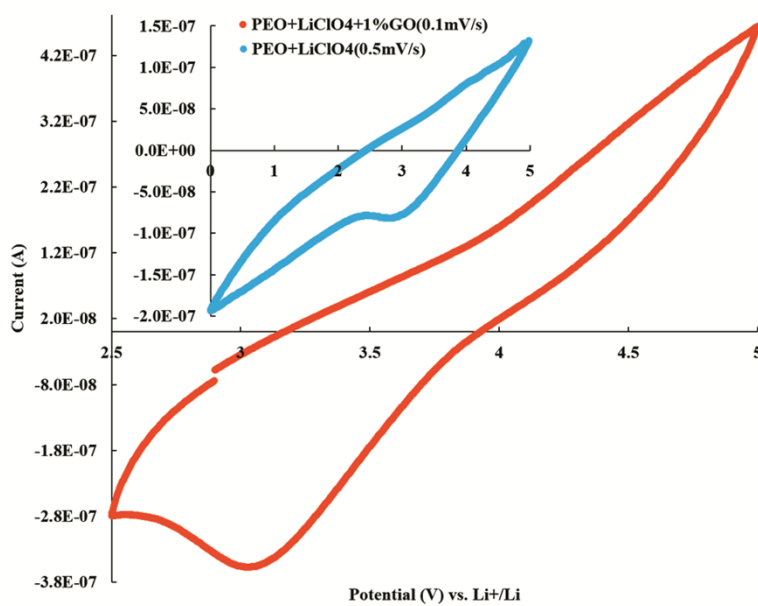

Figure S6 Cyclic voltammetry (CV) of Li cobalt oxide vs. lithium metal with PEO/1%GO+LiClO<sub>4</sub>+plasticizer electrolyte at room temperature and CV for unfilled PEO (inset)

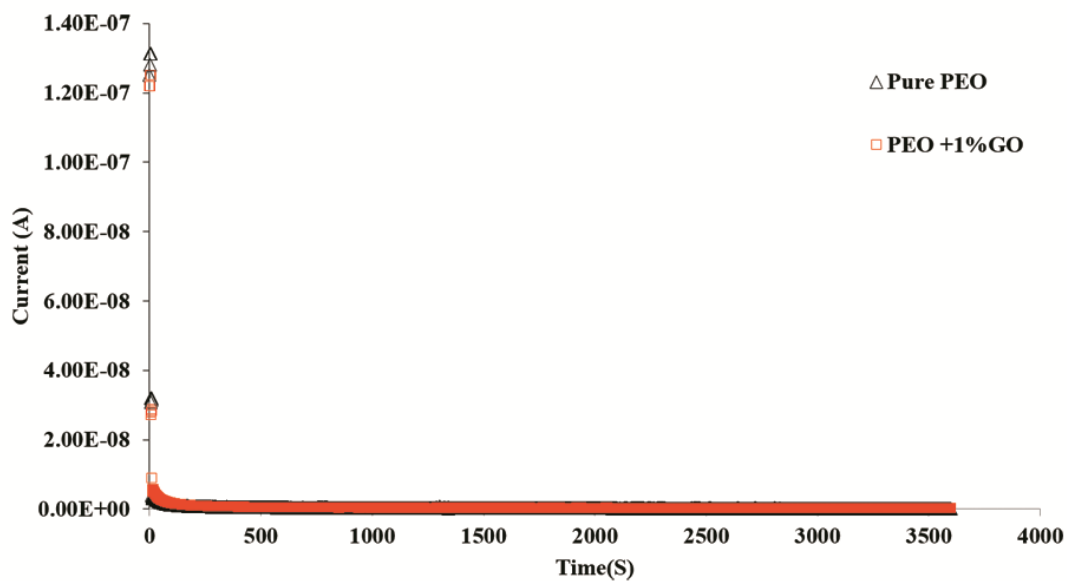

Figure S7 Polarization current curves of PEO and PEO/1%GO

Table S 1 Ionic/electronic transport numbers and electronic conductivities of PEO and PEO+1%GO estimated by DC polarization method

| Samples      | $I_t$ (A) | $I_e$ (A) | $t_{ion}^{(a)}$ (%) | $t_{ele}^{(b)}$ (%) | Ionic conductivity (S/cm) | Electrical conductivity (S/cm) |
|--------------|-----------|-----------|---------------------|---------------------|---------------------------|--------------------------------|
| PEO          | 1.25E-07  | 1.08E-10  | 99.91%              | 0.087%              | 4.06E-07                  | 3.52E-10                       |
| PEO+1%<br>GO | 1.22E-07  | 2.92E-10  | 99.76%              | 0.239%              | 2.35E-05                  | 5.62E-08                       |

$^{(a)}t_{ion} (\%) = 100(I_t - I_e)/I_t$ ;  $^{(b)}t_{ele} (\%) = 100I_e/I_t$ .
